# Supplementary material for: Multi-targeted kinase inhibition alleviates mTOR inhibitor resistance in triple-negative breast cancer
Source: PubMed Central journal article supplement (PMC6797661; doi:10.1007/s10549-019-05380-z), 2019-08-06
Supplement: 10549_2019_5380_MOESM1_ESM.pdf [file 10549_2019_5380_MOESM1_ESM.pdf]

## **Multi-targeted kinase inhibition alleviates mTOR inhibitor resistance in triple negative breast cancer**

Jichao He<sup>1</sup>, Ronan P. McLaughlin<sup>1</sup>, Vera van der Noord<sup>1</sup>, John A. Foekens<sup>2</sup>, John W. M. Martens<sup>2</sup>, Gerard van Westen<sup>1</sup>, Yinghui Zhang<sup>1</sup>, Bob van de Water<sup>1,3</sup>

<sup>1</sup>Division of Drug Discovery and Safety, Leiden Academic Centre for Drug Research, Leiden University, 2300 RA Leiden, the Netherlands

<sup>2</sup>Department of Medical Oncology and Cancer Genomic Netherlands, Erasmus MC Cancer Institute, Erasmus Medical Centre, 3000 CA Rotterdam, the Netherlands.

<sup>3</sup>Correspondence: Bob van de Water, Division of Drug Discovery and Safety, Leiden Academic Centre for Drug Research, Leiden University, 2300 RA Leiden, the Netherlands.

Email: [b.water@lacr.leidenuniv.nl](mailto:b.water@lacr.leidenuniv.nl); phone: +31-71--5276223

### **ELECTRONIC SUPPLEMENTAL MATERIAL**

**Figures S1-4**

## Supplementary Figure Legends

### Suppl. Fig. S1

Effects of co-treatment with PD184352, gefitinib or AEE788 on rapamycin-mediated proliferative inhibition in TNBC cells. SUM149PT (**a, b**) and HCC1806 (**c**) cells were treated with Rap in dose range alone or combined with PD184352 (PD), gefitinib (Gef) or AEE788 (AEE) at indicated concentrations for 4 days, followed by SRB proliferation assay.

### Suppl. Fig. S2

Proliferation response of rapalog-resistant TNBC cell lines towards VEGFR, EGFR, PDGFR, ABL and S6K inhibitors. TNBC cells were treated with KI at 1  $\mu$ M for 4 days, followed by SRB proliferation assay. Strong inhibitory effect on proliferation was indicated in green and weak in red.

### Suppl. Fig. S3

Combinatorial effect of rapamycin and AEE788 on proliferation and cell death of MCF10A (**a**) and RPTEC (**b**) cells. Proliferative response (upper panel, SRB absorbance), early apoptosis (middle panel, AnV<sup>+</sup>) and late apoptosis/necrosis (bottom panel, PI<sup>+</sup>) of MCF10A and RPTEC cells, to Rap alone or combined with AEE788 respectively. Cisplatin (100  $\mu$ M) was used as positive control.

### Suppl. Fig. S4

Combinatorial effect of rapamycin and inhibitors targeting CDK4/6-Cyclin D1 complexes on proliferation of rapalog-resistant SUM149PT (**a**) and HCC1143 (**b**) TNBC cells. Cells were treated Rap alone, or in combination with selective CDK4/6 inhibitor palbociclib or LY2835219 at 0.01  $\mu$ M for 4 days (two- way ANOVA \*  $p < 0.05$ , \*\*  $p < 0.01$ , \*\*\*  $p < 0.001$ ).

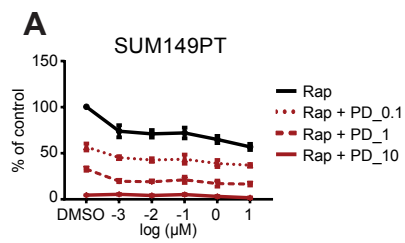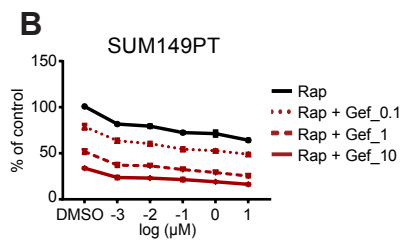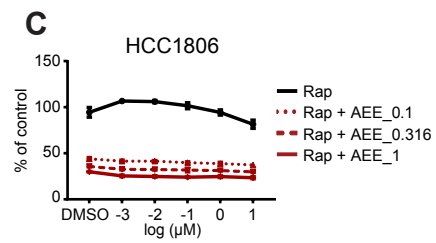

He et al Suppl. Fig. S1

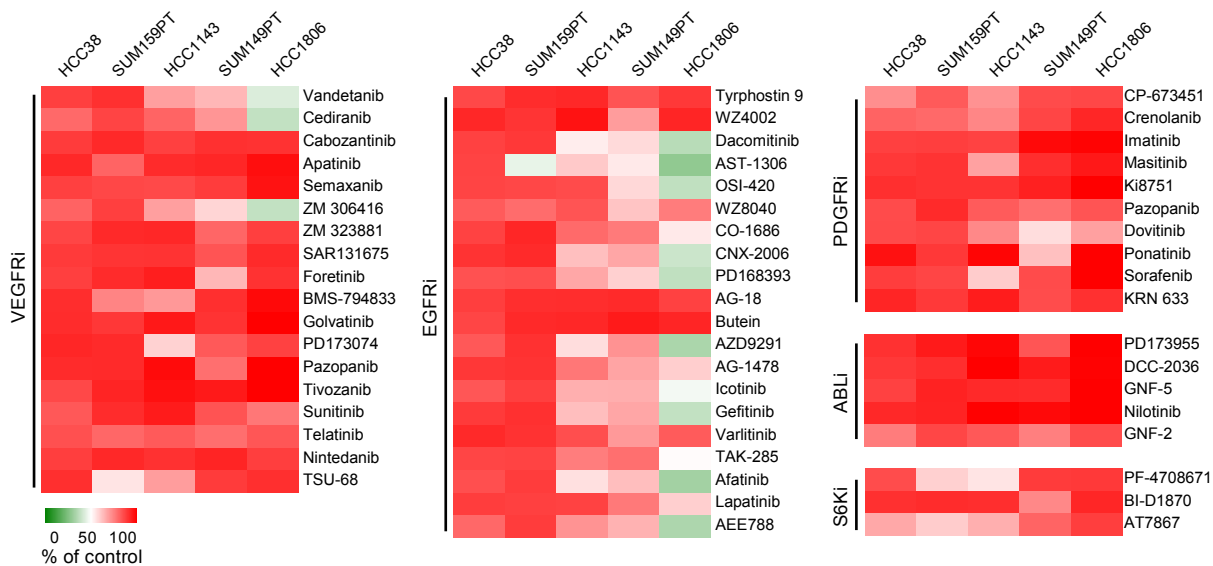

He et al Suppl. Fig. S2

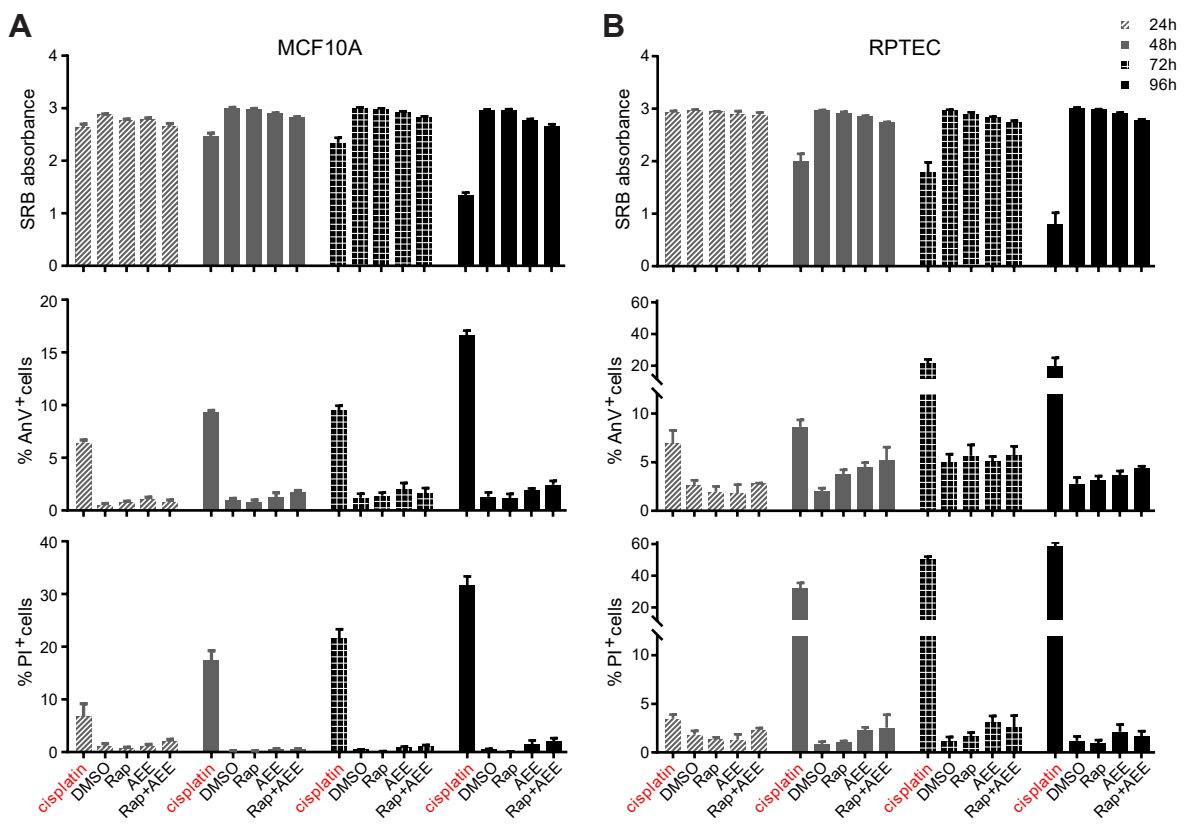

He et al Suppl. Fig. S3

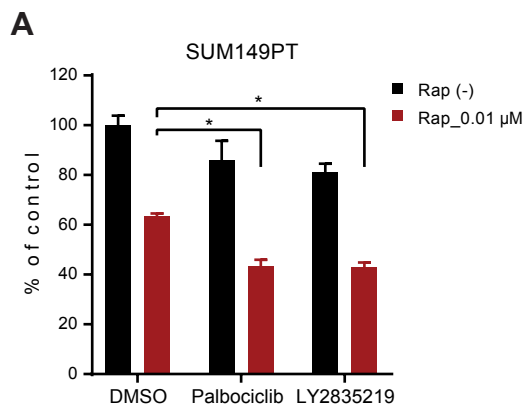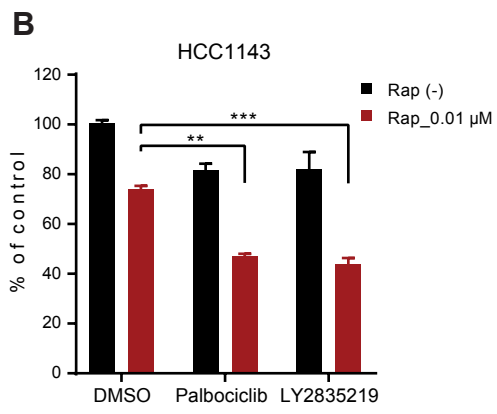

He et al Suppl. Fig. S4
